# Supplementary material for: Improving the activity and thermostability of PETase from Ideonella sakaiensis through modulating its post-translational glycan modification
Source: PubMed Central journal article supplement (PMC9839772; doi:10.1038/s42003-023-04413-0), 2023-01-13
Supplement: 42003_2023_4413_MOESM1_ESM.pdf [file 42003_2023_4413_MOESM1_ESM.pdf]

## Supplementary materials

### Supplementary Table 1 Sequences of the proteins expressed in the present study

| The amino acid sequence of <i>Is</i> PETase                                                                                                                                                                                     |            |            |            |            |                       |
|---------------------------------------------------------------------------------------------------------------------------------------------------------------------------------------------------------------------------------|------------|------------|------------|------------|-----------------------|
| 10                                                                                                                                                                                                                              | 20         | 30         | 40         | 50         | 60                    |
| MNFPRASRLM                                                                                                                                                                                                                      | QAAVLGGLMA | VSAAATA    | QTN        | PYARGPNPTA | ASLEASAGPF TVRSFTVSRP |
| 70                                                                                                                                                                                                                              | 80         | 90         | 100        | 110        | 120                   |
| SGYGAGTVYY                                                                                                                                                                                                                      | PTNAGGTVGA | IAIVPGYTAR | QSSIKWWGPR | LASHGFVVIT | IDTNSTLDQP            |
| 130                                                                                                                                                                                                                             | 140        | 150        | 160        | 170        | 180                   |
| SSRSSQMAA                                                                                                                                                                                                                       | LRQVASLNGT | SSSPIYGKVD | TARMGVMGWS | MGGGGSLISA | ANNPSLKAAA            |
| 190                                                                                                                                                                                                                             | 200        | 210        | 220        | 230        | 240                   |
| PQAPWDSSTN                                                                                                                                                                                                                      | FSSVTVPTLI | FACENDSIAP | VNSSALPIYD | SMSRNAKQFL | EINGGSHSCA            |
| 250                                                                                                                                                                                                                             | 260        | 270        | 280        | 290        |                       |
| NSGNSQALI                                                                                                                                                                                                                       | GKKGVAMMKR | FMDNDTRYST | FACENPNSTR | VSDFRTANCS |                       |
| * The highlighted yellow region is the native signal peptide of <i>Is</i> PETase. This peptide was removed when expressed in <i>E. coli</i> . All eight potential N-linked glycosylation sites are highlighted with gray color. |            |            |            |            |                       |
| The amino acid sequence of Fast-PETase                                                                                                                                                                                          |            |            |            |            |                       |
| 10                                                                                                                                                                                                                              | 20         | 30         | 40         | 50         | 60                    |
| MNFPRASRLM                                                                                                                                                                                                                      | QAAVLGGLMA | VSAAATA    | QTN        | PYARGPNPTA | ASLEASAGPF TVRSFTVSRP |
| 70                                                                                                                                                                                                                              | 80         | 90         | 100        | 110        | 120                   |
| SGYGAGTVYY                                                                                                                                                                                                                      | PTNAGGTVGA | IAIVPGYTAR | QSSIKWWGPR | LASHGFVVIT | IDTNSTLDQP            |
| 130                                                                                                                                                                                                                             | 140        | 150        | 160        | 170        | 180                   |
| SRSSQMAA                                                                                                                                                                                                                        | LRQVASLNGT | SSSPIYGKVD | TARMGVMGWS | MGGGGSLISA | ANNPSLKAAA            |
| 190                                                                                                                                                                                                                             | 200        | 210        | 220        | 230        | 240                   |
| PQAPWFSSTN                                                                                                                                                                                                                      | FSSVTVPTLI | FACENDSIAP | VNSSALPIYD | SMSNAKQFL  | EINGGSHSCA            |
| 250                                                                                                                                                                                                                             | 260        | 270        | 280        | 290        |                       |
| NSGNSQALI                                                                                                                                                                                                                       | GKKGVAMMKR | FMDNDTRYST | FACENPNSTA | VSDFRTANCS |                       |
| * The highlighted yellow region is the native signal peptide of <i>Is</i> PETase. All eight potential N-linked glycosylation sites are highlighted with gray color. All five mutation sites are highlighted with red color.     |            |            |            |            |                       |
| The amino acid sequence of PNGase F                                                                                                                                                                                             |            |            |            |            |                       |
| 10                                                                                                                                                                                                                              | 20         | 30         | 40         | 50         | 60                    |
| MRKLLIFSIS                                                                                                                                                                                                                      | AYLMAGIVSC | KGVDSATPVT | EDRLALNAVN | APADNTVNIK | TFDKVKNAFG            |

|            |            |             |             |            |            |
|------------|------------|-------------|-------------|------------|------------|
| 70         | 80         | 90          | 100         | 110        | 120        |
| DGLSQAEGT  | FTFPADVTTV | KTIKMFINKNE | CPNKTCDEWD  | RYANVYVKNK | TTGEWYEIGR |
| 130        | 140        | 150         | 160         | 170        | 180        |
| FITPYWVGTE | KLPRGLEIDV | TDFKSLLSGN  | TELKIYTETW  | LAKGREYSVD | FDIVYGTDPY |
| 190        | 200        | 210         | 220         | 230        | 240        |
| KYSAVVPVIQ | YNKSSIDGVP | YGKAHTLGLK  | KNIQLPTNTE  | KAYLRRTISG | WGHAKPYDAG |
| 250        | 260        | 270         | 280         | 290        | 300        |
| SRGCAEWCFR | THTIAINNAN | TFQHQLGALG  | CSANPINNQS  | PGNWAPDRAG | WCPGMAVPTR |
| 310        | 320        | 330         | 340         | 350        |            |
| IDVLNNSLTG | STFSYEEKFQ | SWTNNGTNGD  | AFYAISSEFVI | AKSNTPISAP | VVTN       |

**Supplementary Table 2 Mass spectrum to identify the main bands in the fermentation supernatant of GS115-IP-4 after treated with Endo H**

|                                                                                     | Description | Coverage [%]                   | Peptides | PSMs | Unique Peptides | Sequest HT |       |
|-------------------------------------------------------------------------------------|-------------|--------------------------------|----------|------|-----------------|------------|-------|
| <b>band 1</b>                                                                       |             |                                |          |      |                 |            |       |
| 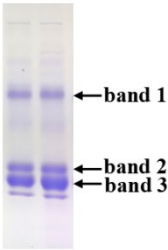 | C4R312      | Dihydrolipoyl dehydrogenase    | 42       | 14   | 20              | 14         | 67.66 |
|                                                                                     | C4R3H3      | SCP domain-containing protein  | 12       | 3    | 5               | 3          | 12.46 |
|                                                                                     | C4QVL4      | 1,3-beta-glucanosyltransferase | 12       | 4    | 4               | 4          | 10.73 |
| <b>band 2</b>                                                                       |             |                                |          |      |                 |            |       |
|                                                                                     | TARGET      | TARGET                         | 24       | 4    | 9               | 4          | 28.18 |
|                                                                                     | F2QQT7      | Putative glucanase             | 5        | 2    | 8               | 2          | 21.91 |
|                                                                                     | F2QPL8      | Endo-beta-1,3-glucanase        | 20       | 5    | 7               | 5          | 18.05 |
|                                                                                     | C4R489      | Uncharacterized protein        | 19       | 4    | 5               | 4          | 12.45 |
| <b>band 3</b>                                                                       |             |                                |          |      |                 |            |       |
|                                                                                     | F2QPL8      | Endo-beta-1,3-glucanase        | 14       | 3    | 5               | 3          | 15.22 |
|                                                                                     | TARGET      | TARGET                         | 16       | 2    | 3               | 2          | 12.12 |

\*TARGET indicates *IsPETase*

### Supplementary Table 3 MS/MS to analyze N-linked glycosylation on *IsPETase-Pp*

Supplementary Table 3A Parameters for data search using PEAKS GlycanFinder software

| items                  | value                                                                                                        |
|------------------------|--------------------------------------------------------------------------------------------------------------|
| Precursor tolerance    | 20.0 ppm                                                                                                     |
| Fragment tolerance     | 0.05 Da                                                                                                      |
| Modifications          | Fixed: Carbamidomethylation/+57.02 Da (C)<br>Variable: Oxidation/+15.99 Da (M),<br>Deamidation/+0.98 Da (NQ) |
| N-linked Peptide Score | 15                                                                                                           |
| N-linked Glycan Score  | 1                                                                                                            |
| Database               | Sequence                                                                                                     |

Supplementary Table 3B Percentage of N-linked glycosylation for each site

| site | modification type | peak Area | percentage(%) |
|------|-------------------|-----------|---------------|
| N114 | glycosylated      | 2.12E+04  | 100           |
|      | non-glycosylated  | 0.00E+00  | 0             |
| N138 | glycosylated      | 8.13E+05  | 36.57         |
|      | non-glycosylated  | 1.41E+06  | 63.43         |
| N190 | glycosylated      | 0.00E+00  | 0             |
|      | non-glycosylated  | 0.00E+00  | 0             |
| N212 | glycosylated      | 4.35E+04  | 82.23         |
|      | non-glycosylated  | 9.40E+03  | 17.77         |
| N264 | glycosylated      | 5.08E+05  | 19.78         |
|      | non-glycosylated  | 2.06E+06  | 80.22         |
| N288 | glycosylated      | 6.97E+04  | 100           |
|      | non-glycosylated  | NA        | 0             |

Note: 0 of peak area indicates the concentration of the peptide is too low to gain a reading. NA indicated that no peptide is detected.

Supplementary Table 3C Component and percentage of N-linked glycan side chains for each site

|                                                                                                                    |                                                                                               |                                                                                                                      |
|--------------------------------------------------------------------------------------------------------------------|-----------------------------------------------------------------------------------------------|----------------------------------------------------------------------------------------------------------------------|
|  N-acetylglucosamine (GlcNAc)   |  Galactose |  Fucose                           |
|  N-acetylgalactosamine (GalNAc) |  Mannose   |  N-glycolyneuraminic acid (NeuGc) |

| site | component        | peak area | percentage | structure                                                                             |
|------|------------------|-----------|------------|---------------------------------------------------------------------------------------|
| N114 | (HexNAc)3(Hex)8  | 2.12E+04  | 100%       |  |
| N138 | (HexNAc)2(Hex)9  | 3.63E+05  | 44.64%     |  |
|      | (HexNAc)2(Hex)10 | 3.12E+05  | 38.38%     |  |

|      |                  |          |        |  |
|------|------------------|----------|--------|--|
|      | (HexNAc)2(Hex)8  | 7.88E+04 | 9.70%  |  |
|      | (HexNAc)2(Hex)7  | 3.41E+04 | 4.19%  |  |
|      | (HexNAc)2(Hex)6  | 1.19E+04 | 1.46%  |  |
|      | (HexNAc)2(Hex)5  | 1.02E+04 | 1.26%  |  |
|      | (HexNAc)2(Hex)1  | 3.08E+03 | 0.38%  |  |
| N190 | (HexNAc)2(Hex)10 | 0        | 0      |  |
|      | (HexNAc)2(Hex)10 | 1.69E+04 | 38.83% |  |
|      | (HexNAc)2(Hex)9  | 2.85E+03 | 31.93% |  |
| N212 | (HexNAc)2(Hex)8  | 9.87E+03 | 22.69% |  |
|      | (HexNAc)2(Hex)7  | 1.39E+04 | 6.54%  |  |
|      | (HexNAc)2(Hex)9  | 4.34E+05 | 85.38% |  |
|      | (HexNAc)2(Hex)10 | 2.73E+04 | 5.38%  |  |
|      | (HexNAc)2(Hex)8  | 2.57E+04 | 5.05%  |  |
| N264 | (HexNAc)2(Hex)7  | 1.42E+04 | 2.79%  |  |
|      | (HexNAc)2(Hex)5  | 4.63E+03 | 0.91%  |  |
|      | (HexNAc)2(Hex)4  | 1.57E+03 | 0.31%  |  |
|      | (HexNAc)4(Hex)7  | 9.65E+02 | 0.002% |  |
|      | (HexNAc)2(Hex)10 | 1.77E+04 | 25.44% |  |
| N288 | (HexNAc)2(Hex)9  | 5.20E+04 | 74.56% |  |

**Supplementary Table 4 The main N-linked glycan side chains on Asn205 and Asn277 of *IsPETase-Pp* when the setting N-linked Glycan Score is 0**

Supplementary Table 4A Parameters for data search using PEAKS GlycanFinder software

| items                  | value                                                                                                        |
|------------------------|--------------------------------------------------------------------------------------------------------------|
| Precursor tolerance    | 20.0 ppm                                                                                                     |
| Fragment tolerance     | 0.05 Da                                                                                                      |
| Modifications          | Fixed: Carbamidomethylation/+57.02 Da (C)<br>Variable: Oxidation/+15.99 Da (M)、<br>Deamidation/+0.98 Da (NQ) |
| N-linked Peptide Score | 15                                                                                                           |
| N-linked Glycan Score  | 0                                                                                                            |
| Database               | Sequence                                                                                                     |

Supplementary Table 4B Percentage of N-linked glycosylation for Asn205 and Asn277

| site | modification type | area     | percentage(%) |
|------|-------------------|----------|---------------|
| N205 | glycosylated      | 4.19E+03 | 100           |
|      | non-glycosylated  | 0        | 0             |
| N277 | glycosylated      | 6.05E+04 | 100           |
|      | non-glycosylated  | 0        | 0             |

Note: 0 of peak area indicates the concentration of the peptide is too low to gain a reading.

Supplementary Table 4C Component and percentage of N-linked glycan side chains for Asn205 and Asn277

|                                                                                                                    |                                                                                               |                                                                                                                       |
|--------------------------------------------------------------------------------------------------------------------|-----------------------------------------------------------------------------------------------|-----------------------------------------------------------------------------------------------------------------------|
|  N-acetylglucosamine (GlcNAc)   |  Galactose |  Fucose                            |
|  N-acetylgalactosamine (GalNAc) |  Mannose   |  N-glycolylneuraminic acid (NeuGc) |

| site | component               | peak area | percentage | structure                                                                             |
|------|-------------------------|-----------|------------|---------------------------------------------------------------------------------------|
| N205 | (HexNAc)5(Hex)3         | 2.23E+03  | 53.28%     | 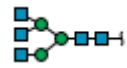 |
|      | (HexNAc)3(Hex)6(Fuc)1   | 1.96E+03  | 46.72%     |  |
| N277 | (HexNAc)2(Hex)1         | 2.93E+04  | 48.43%     |  |
|      | (HexNAc)5(Hex)6(NeuGc)2 | 3.12E+04  | 51.57%     |  |

**Supplementary Table 5 MS/MS to analyze O-linked glycosylation on *IsPETase-Pp***

Supplementary Table 5 A Parameters for data search using PEAKS GlycanFinder software

| items                  | value                                                                                                        |
|------------------------|--------------------------------------------------------------------------------------------------------------|
| Precursor tolerance    | 20.0 ppm                                                                                                     |
| Fragment tolerance     | 0.05 Da                                                                                                      |
| Modifications          | Fixed: Carbamidomethylation/+57.02 Da (C)<br>Variable: Oxidation/+15.99 Da (M),<br>Deamidation/+0.98 Da (NQ) |
| N-linked Peptide Score | 15                                                                                                           |
| N-linked Glycan Score  | 1                                                                                                            |
| Database               | Sequence                                                                                                     |

Supplementary Table 5 B Percentage of O-linked glycosylation for each site

| site | modification type | area     | percentage(%) |
|------|-------------------|----------|---------------|
| S7   | glycosylated      | 5.65E+04 | 12.88         |
|      | non-glycosylated  | 3.82E+05 | 87.12         |
| S22  | glycosylated      | 5.81E+04 | 27.26         |
|      | non-glycosylated  | 1.55E+05 | 72.74         |
| T26  | glycosylated      | 1.61E+03 | 0.45          |
|      | non-glycosylated  | 3.53E+05 | 99.55         |
| T29  | glycosylated      | 7.53E+03 | 2.09          |
|      | non-glycosylated  | 3.52E+05 | 97.91         |
| T39  | glycosylated      | 7.53E+04 | 1.91          |
|      | non-glycosylated  | 3.87E+06 | 98.09         |
| S42  | glycosylated      | 4.43E+03 | 0.16          |
|      | non-glycosylated  | 2.75E+06 | 99.84         |
| T51  | glycosylated      | 1.97E+03 | 0.19          |
|      | non-glycosylated  | 1.03E+06 | 99.81         |
| S58  | glycosylated      | 8.28E+04 | 1.78          |
|      | non-glycosylated  | 4.57E+06 | 98.22         |
| T67  | glycosylated      | 2.70E+05 | 4.78          |
|      | non-glycosylated  | 5.38E+06 | 95.22         |
| T72  | glycosylated      | 1.25E+03 | 0.02          |
|      | non-glycosylated  | 6.45E+06 | 99.98         |
| T77  | glycosylated      | 6.85E+03 | 0.01          |
|      | non-glycosylated  | 6.72E+06 | 99.90         |
| T151 | glycosylated      | 6.88E+02 | 0.04          |
|      | non-glycosylated  | 1.64E+06 | 99.96         |
| S166 | glycosylated      | 1.56E+06 | 13.15         |
|      | non-glycosylated  | 1.03E+07 | 86.85         |
| S169 | glycosylated      | 1.83E+06 | 15.09         |
|      | non-glycosylated  | 1.03E+07 | 84.91         |
| S175 | glycosylated      | 3.01E+05 | 3.11          |

|      |                  |          |       |
|------|------------------|----------|-------|
|      | non-glycosylated | 9.37E+06 | 96.89 |
| S242 | glycosylated     | 3.23E+04 | 0.34  |
|      | non-glycosylated | 9.56E+06 | 99.66 |
| S245 | glycosylated     | 3.29E+04 | 0.35  |
|      | non-glycosylated | 9.35E+06 | 99.65 |
| S266 | glycosylated     | 1.44E+04 | 57.83 |
|      | non-glycosylated | 1.05E+04 | 42.17 |
| S269 | glycosylated     | 1.33E+04 | 55.88 |
|      | non-glycosylated | 1.05E+04 | 44.12 |

Supplementary Table 5C Component and percentage of O-linked glycan side chains for each site

|                                                                                   |                                   |                                                                                   |           |                                                                                   |                                   |
|-----------------------------------------------------------------------------------|-----------------------------------|-----------------------------------------------------------------------------------|-----------|-----------------------------------------------------------------------------------|-----------------------------------|
|  | N-acetylglucosamine (GlcNAc)      |  | Galactose |  | Fucose                            |
|  | N-acetylgalactosamine (GalNAc)    |  | Mannose   |  | N-glycolylneuraminic acid (NeuAc) |
|  | N-glycolylneuraminic acid (NeuGc) |  | Glucose   |                                                                                   |                                   |

| site | component               | peak area | percentage | structure                                                                             |
|------|-------------------------|-----------|------------|---------------------------------------------------------------------------------------|
| S7   | (HexNAc)1               | 5.65E+04  | 100%       |    |
|      | (HexNAc)3               | 5.65E+04  | 97.18%     |  |
| S22  | (HexNAc)1               | 1.34E+03  | 2.30%      |  |
|      | (Hex)1                  | 2.98E+02  | 0.51%      |  |
| T26  | (HexNAc)3               | 8.83E+02  | 54.88%     |  |
|      | (Hex)1                  | 7.26E+02  | 45.12%     |  |
|      | (Hex)1                  | 5.04E+03  | 66.95%     |  |
| T29  | (HexNAc)2(Hex)4(Fuc)1   | 2.49E+03  | 33.05%     |  |
| T39  | (HexNAc)1(Hex)1(NeuAc)1 | 7.53E+04  | 100%       |  |
| S42  | (HexNAc)1(Hex)1         | 4.43E+03  | 100%       |  |
| T51  | (Hex)1                  | 1.97E+03  | 100%       |  |
| S58  | (Fuc)1                  | 8.28E+04  | 100%       |  |
| T67  | (Hex)1                  | 2.70E+05  | 100%       |  |
| T72  | (HexNAc)1(Fuc)1         | 1.25E+03  | 100%       |  |
|      | (Fuc)1                  | 0         | 0          |  |
| T77  | (HexNAc)1(Hex)2(Fuc)2   | 4.64E+03  | 67.74%     |  |

|      |                               |          |        |  |
|------|-------------------------------|----------|--------|--|
|      | (HexNAc)1(Fuc)1               | 2.21E+03 | 32.26% |  |
| T151 | (Hex)1                        | 6.88E+02 | 100%   |  |
| S166 | (Hex)1                        | 1.56E+06 | 99.57% |  |
|      | (HexNAc)1(NeuAc)1             | 2.95E+03 | 0.43%  |  |
|      | (HexNAc)1(Hex)2               | 1.56E+06 | 85.31% |  |
|      | (HexNAc)3                     | 2.43E+05 | 13.32% |  |
| S169 | (HexNAc)1(Fuc)1               | 2.08E+04 | 1.14%  |  |
|      | (HexNAc)1(Hex)1(NeuAc)1       | 2.95E+03 | 0.16%  |  |
|      | (HexNAc)2(Hex)3(Fuc)1         | 9.75E+02 | 0.05%  |  |
|      | (HexNAc)1(Hex)1(Fuc)1         | 3.20E+02 | 0.02%  |  |
|      | (HexNAc)2(Hex)1(Fuc)1         | 2.58E+05 | 85.77% |  |
|      | (HexNAc)3(Hex)2(Fuc)1         | 3.92E+04 | 13.03% |  |
|      | (HexNAc)3(Hex)1(Fuc)1         | 2.16E+03 | 0.72%  |  |
| S175 | (HexNAc)1(Hex)1(NeuAc)4       | 5.14E+02 | 0.17%  |  |
|      | (Hex)1(Fuc)1                  | 3.63E+02 | 0.12%  |  |
|      | (HexNAc)1(Hex)1(Fuc)1         | 3.20E+02 | 0.11%  |  |
|      | (HexNAc)1(Hex)1(NeuAc)3       | 1.41E+02 | 0.05%  |  |
|      | (HexNAc)2(Hex)1(Fuc)1(NeuAc)2 | 9.54E+01 | 0.03%  |  |
| S242 | (Hex)1(Fuc)1                  | 2.73E+04 | 84.62% |  |
|      | (Fuc)1                        | 4.96E+03 | 15.38% |  |
|      | (HexNAc)1(Hex)2(Fuc)2         | 2.73E+04 | 83.04% |  |
| S245 | (Hex)1(NeuAc)1                | 3.16E+03 | 9.62%  |  |
|      | (Fuc)1                        | 1.81E+03 | 5.50%  |  |
|      | (HexNAc)3(Hex)1(Fuc)1         | 5.14E+02 | 1.57%  |  |



|      |                |          |        |                                                                                     |
|------|----------------|----------|--------|-------------------------------------------------------------------------------------|
|      | (HexNAc)2      | 8.90E+01 | 0.27%  | 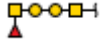 |
| T266 | (Hex)1         | 8.75E+03 | 60.84% |  |
|      | (Fuc)1         | 5.63E+03 | 39.16% |  |
| S269 | (Hex)1         | 7.62E+03 | 57.49% |  |
|      | (Hex)1(NeuAc)1 | 5.63E+03 | 42.51% |  |

Note: 0 of peak area indicates the concentration of the peptide is too low to gain a reading.

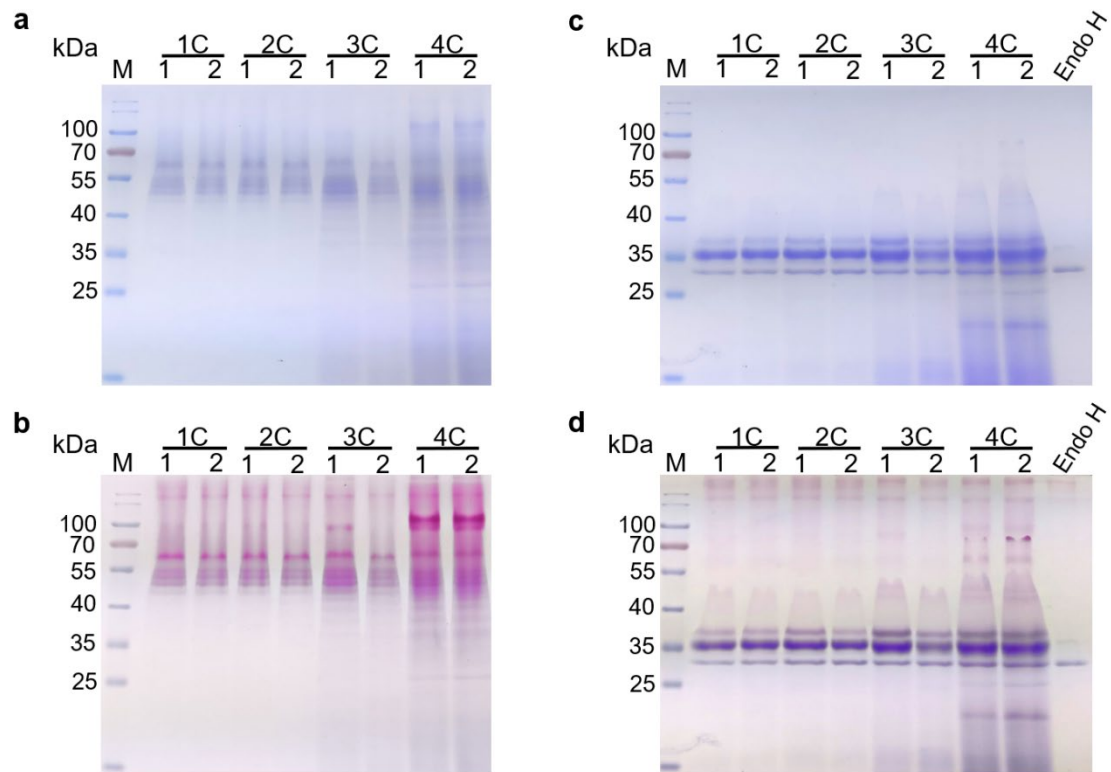

**Supplementary Fig.1: The expression and deglycosylation of *IsPETase-Pp* prepared with the shake-flask fermentation.** **a** SDS-PAGE to analyze *IsPETase-Pp* expressed with *P. pastoris* bearing 1-4 copies of the target gene; Two parallel samples (1, 2) were tested for each copy number. **b** Glycoprotein staining of the gel in (a). **c** SDS-PAGE to analyze the same samples as (a) after treated with Endo H. **d** Glycoprotein staining of the gel in (c). M: protein molecular weight standards (the size of each band is indicated on the left).

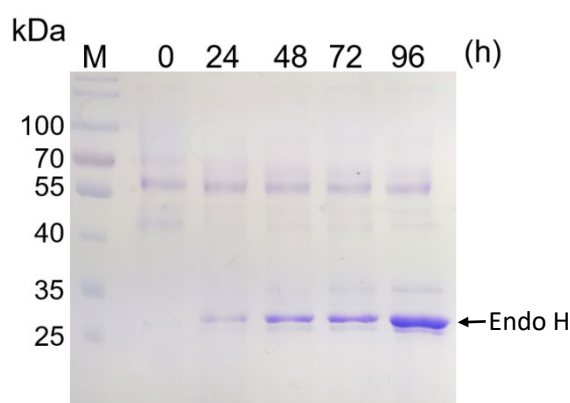

**Supplementary Fig.2: The recombinant Endo H expressed with *P. pastoris* GS115.** The target protein was prepared with the shake-flask fermentation, followed by centrifugation at 5000 rpm for 10 min. The supernatant was gathered and stored at 4 °C for further use. M: protein molecular weight standards (the size of each band is indicated on the left).

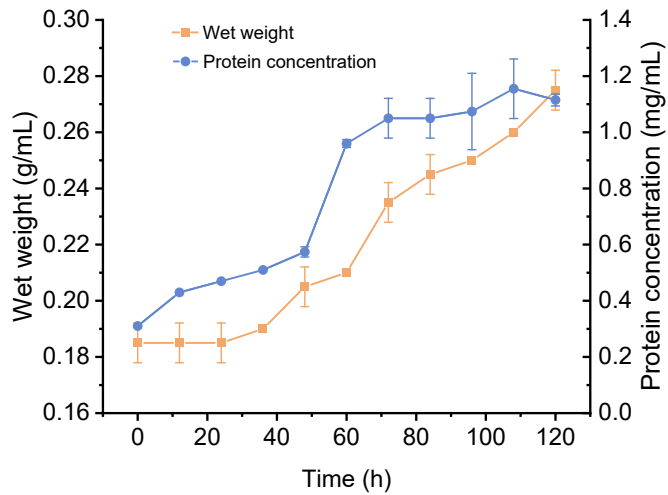

**Supplementary Fig.3:** The time course of the total enzyme activity and protein concentration in the supernatant of the cell culture during the inducing phase of the high-density fermentation. Data are presented as mean  $\pm$  SD.

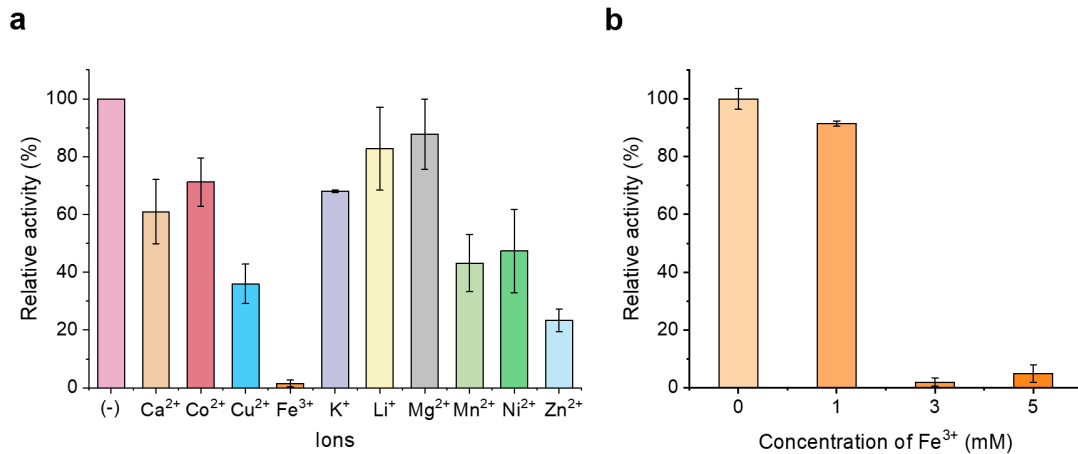

**Supplementary Fig.4: Effect of metal cations on the activity of IsPETase-Pp.** **a** The catalytic activities of IsPETase-Pp in the presence of various metal ions (3 mM). The assay was carried out by adding 200  $\mu$ L of the diluted enzyme (0.4 mg) to 3 mg of amorphous PET in 50 mM glycine-NaOH buffer (pH 9.0) supplemented with 3 mM of different ions to a final volume of 1 mL, followed by incubating at 30  $^{\circ}$ C for 6 h. The reaction was terminated by heating at 85  $^{\circ}$ C for 10 min, and the mixture was centrifuged at 14000 g for 1 min, followed by analysis with HPLC. The activity of the enzyme without extra ions was set to 100%. **b** The catalytic activities of IsPETase-Pp in the presence of ferric ion of 0, 1, 3 and 5 mM, respectively. Data are presented as mean  $\pm$  SD.

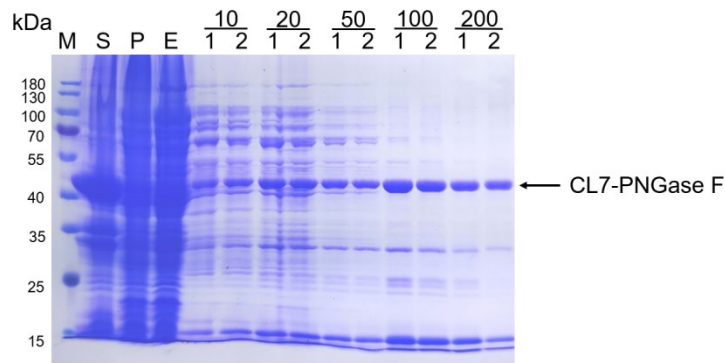

**Supplementary Fig.5: Expression of CL7-PNGase F with *E. coli* and purification with affinity chromatography.** S: supernatant of the cell lysate; P: pellet of the cell lysate; E: flow-through; 10, 20, 50, 100, 200 indicates the concentrations of imidazole (mM) used for elution. Two parallel samples (1, 2) were loaded for each concentration. M: protein molecular weight standards (the size of each band is indicated on the left).

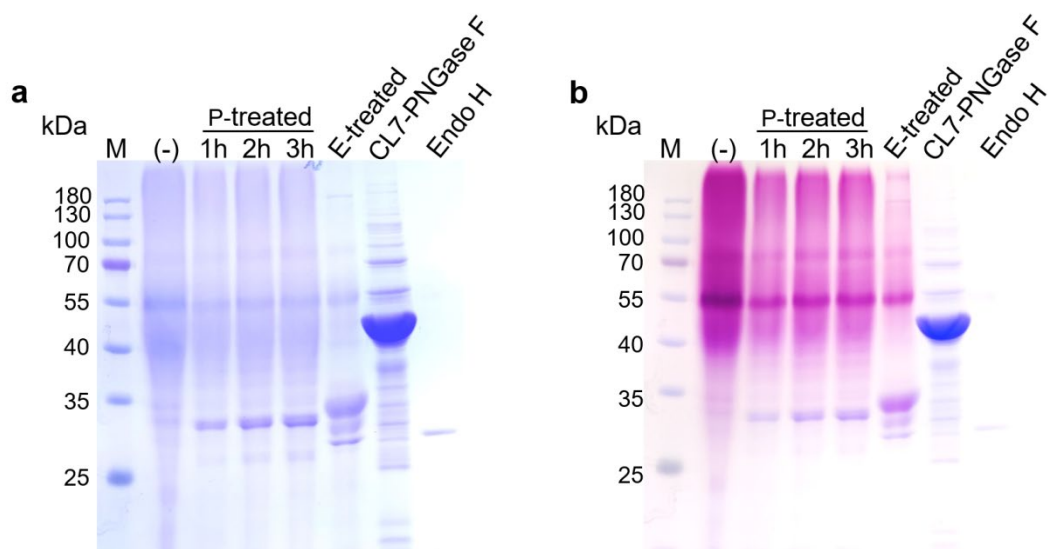

**Supplementary Fig.6: The treatment of *IsPETase-Pp* with CL7-PNGase F. a SDS-PAGE to analyze *IsPETase-Pp* treated with CL7-PNGase F; b Glycoprotein staining of the gel from (a). (-): *IsPETase-Pp* without treatment. P-treated: *IsPETase-Pp* digested with CL7-PNGase F for 1, 2, and 3 h, respectively; E-treated: *IsPETase-Pp* digested with Endo H for half an hour; M: protein molecular weight standards (the size of each band is indicated on the left).**

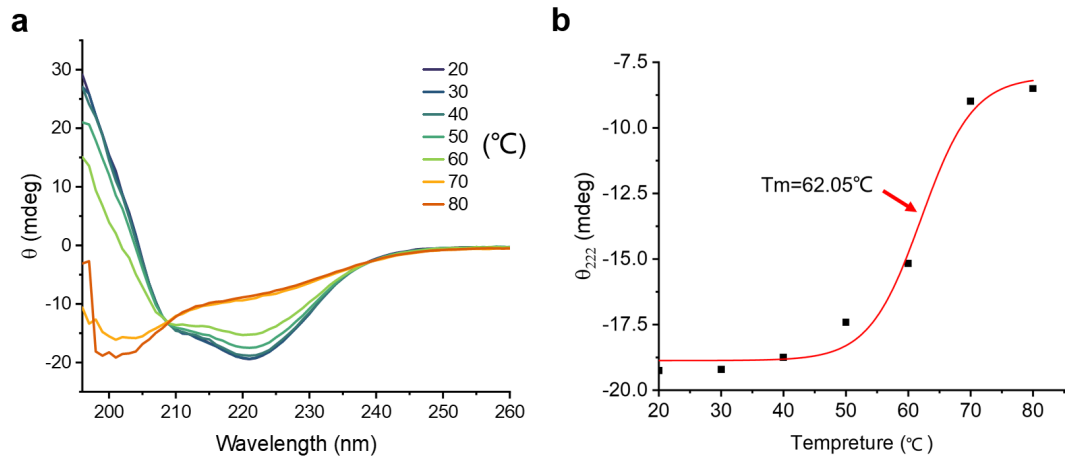

**Supplementary Fig.7: Far-ultraviolet CD to determine the  $T_m$  of partial-deglyco *IsPETase-Pp*.** **a** Far-ultraviolet CD graphs of partial-deglyco *IsPETase-Pp* from 20 to 80 °C. **b** Melting curve of partial-deglyco *IsPETase-Pp*.

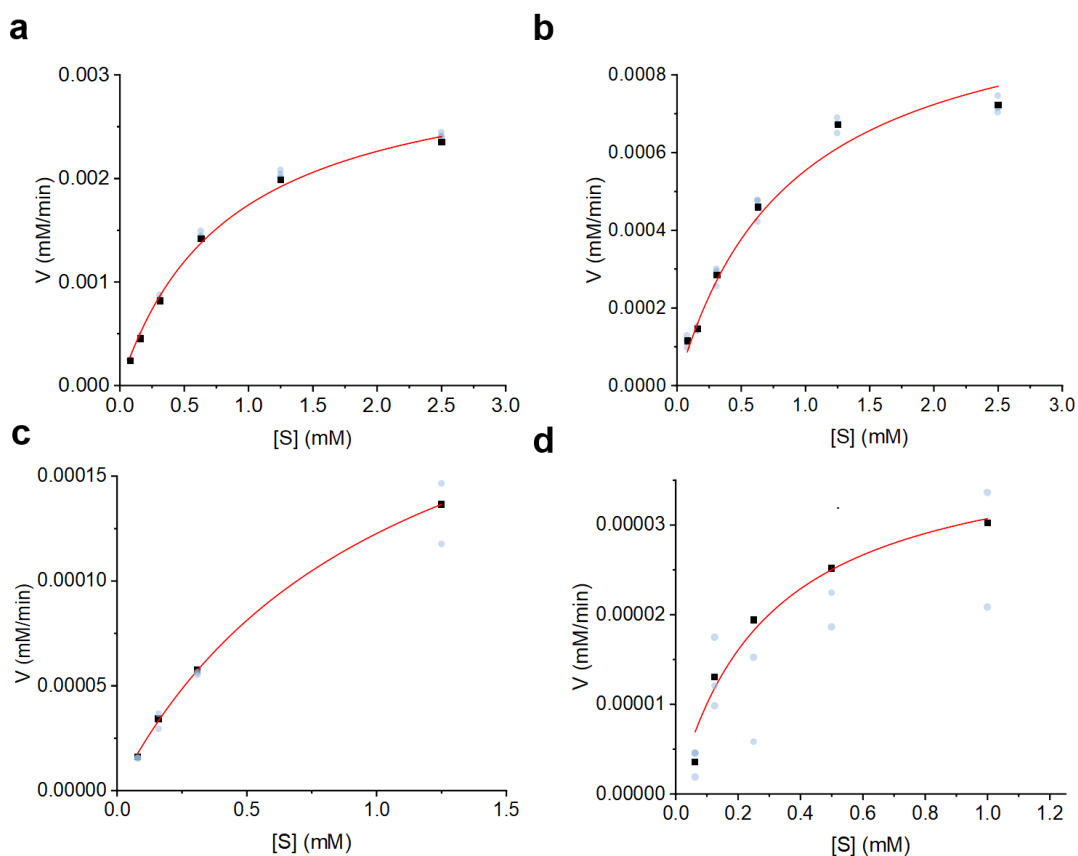

**Supplementary Fig.8: Kinetics curves for enzymatic activities of partial-deglyco *IsPETase-Pp* and *IsPETase-Ec* with MHET and BHET as substrates.** **a** partial-deglyco *IsPETase-Pp* with MHET as the substrate. **b** partial-deglyco *IsPETase-Pp* with BHET as the substrate. **c** *IsPETase-Ec* with MHET as the substrate. **d** *IsPETase-Ec* with BHET as the substrate. For partial-deglyco *IsPETase-Pp*, the concentration of MHET and BHET were 0.08 mM to 3 mM. The reaction was carried out at 30 °C for 2 h in 50 mM glycine-NaOH buffer (pH 9.0) . For *IsPETase-Ec*, the concentration of MHET and BHET were 0.08 mM to 1.5 mM and 0.06 mM to 2 mM. The reaction was carried out at 30 °C in 50 mM glycine-NaOH buffer (pH 9.0) for 3 and 1 h, respectively. The initial rate was measured by measuring the released TPA using HPLC.

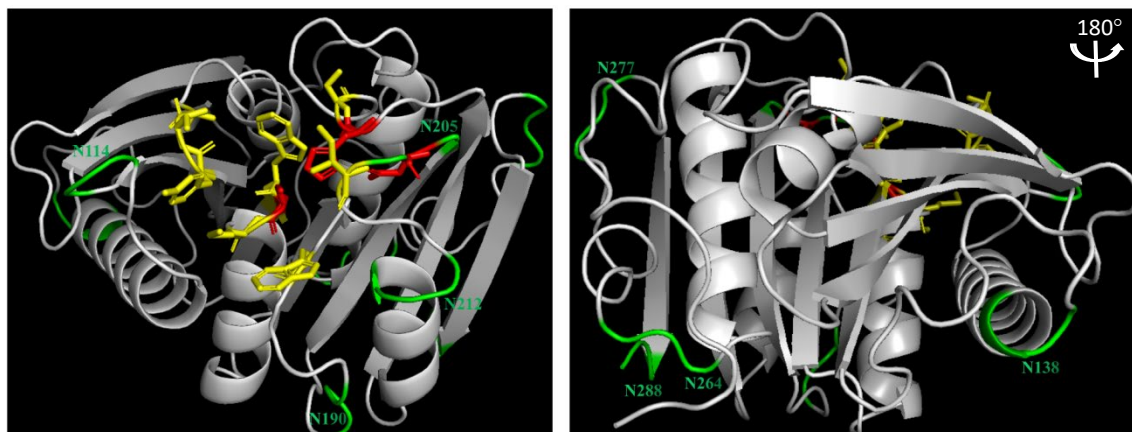

**Supplementary Fig.9: The potential glycosylation sites in *IsPETase* (PDB: 6ANE).** The eight potential N-linked glycosylation sites are labeled in green. The traid and the key amino acid residues involved in catalysis are labeled in red and yellow, respectively.

### N205

Intensity (%) I F A c E N D S I

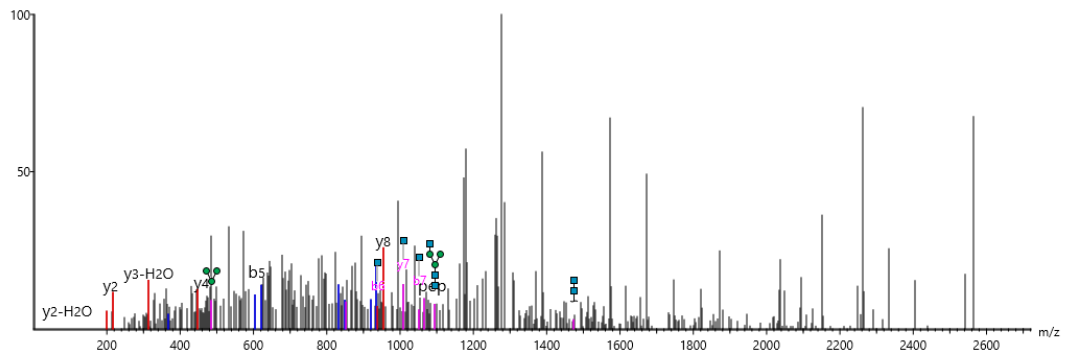

Intensity (%) P T L I F A c E N D S

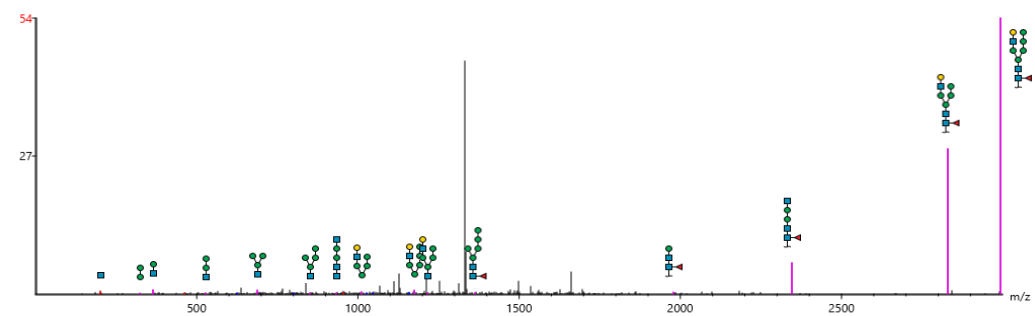

### N277

Intensity (%) A c E N P N S T R V S D F

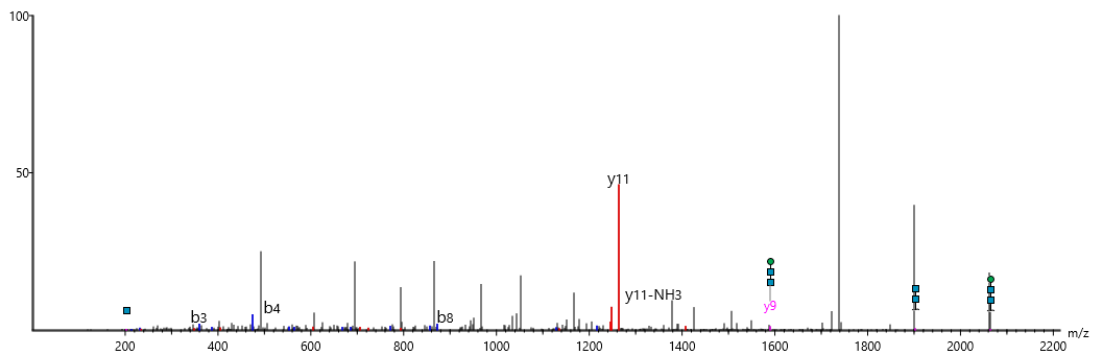

Intensity (%) A c E N P N S T R V S D F R T A N c S

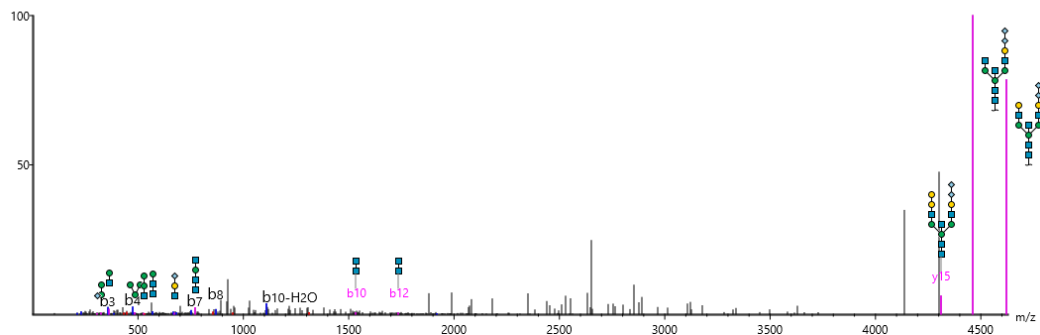



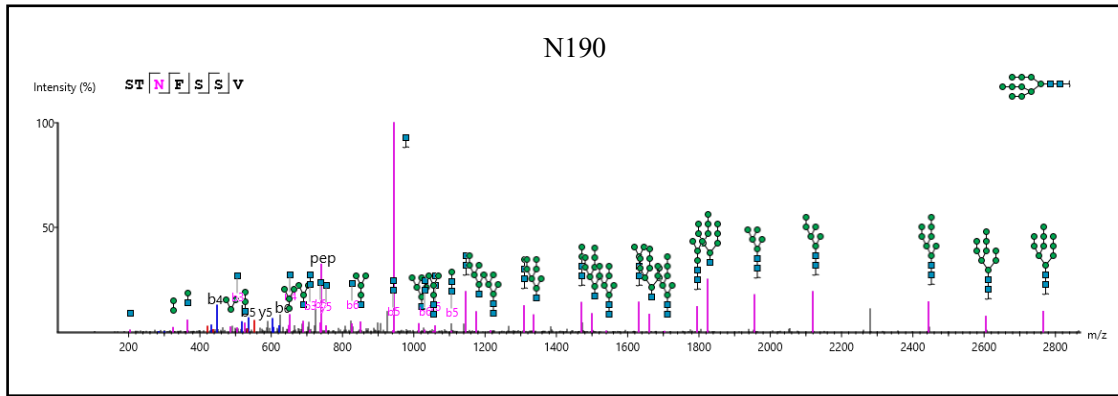

**Supplementary Fig.10: The MS/MS maps of the main N-linked glycan side chains on Asn205, Asn277 and Asn190.**

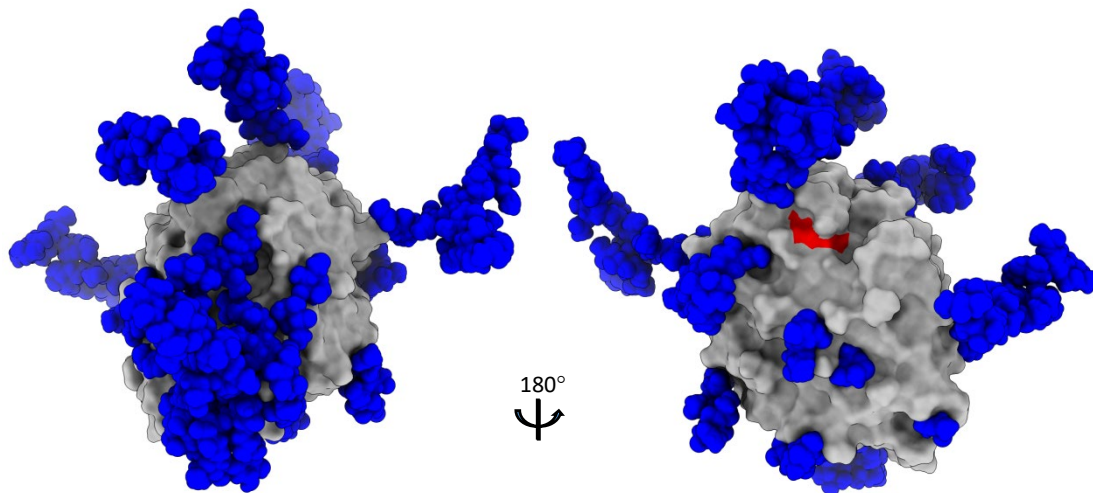

**Supplementary Fig.11: The structure modeling of glycosylated *IsPETase-Pp* (PDB: 6ANE).** The glycoprotein was built at GLYCAM-Web ([www.glycam.org](http://www.glycam.org)) and the figure was illustrated with UCSF chimera. The protein is indicated in gray while N- and O-glycan side chains are indicated in blue. The catalytic center is indicated in red.

Note: According to the result of MS/MS, several glycosylation sites are modified with various glycan types. To simplify the model, the dominant glycan types (with the highest peak area) are chosen to construct the three-dimensional model.

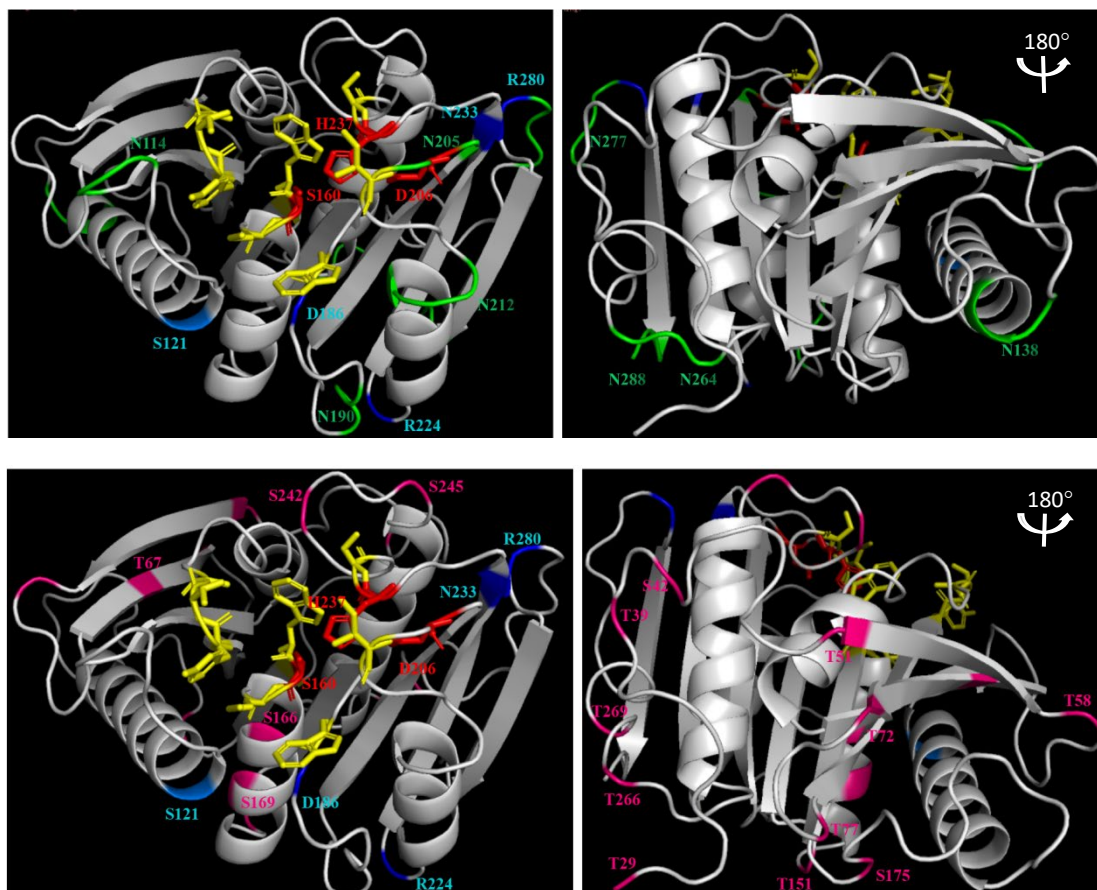

**Supplementary Fig.12: The mutation sites in Fast-PETase and the residues occupied by N-linked and O-linked glycosylation on *IsPETase-Pp* (PDB: 6ANE).** The traid of *IsPETase* are labeled in red. The key residues involved in catalysis are labeled in yellow. The mutation sites in Fast-PETase are labeled in blue. The residues occupied by N-linked and O-linked glycosylation are labeled in green and hotpink, respectively.

Note: S7, S22 and T26 are not shown in the Figure because the first 28 amino acids are not included in the structure.

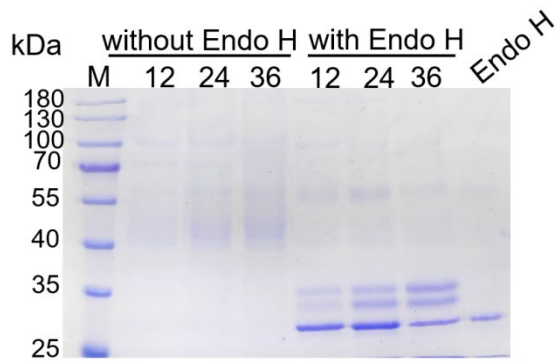

**Supplementary Fig.13: Expression of Fast-PETase-*Pp* with the shake-flask fermentation.** The supernatant of the cell culture was collected every 12 h and treated with Endo H for half an hour at 30 °C.

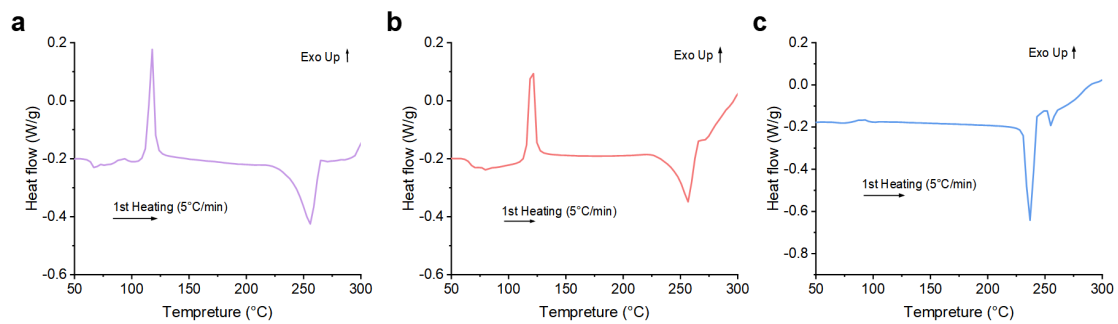

**Supplementary Fig.14: DSC to determine the percentage crystallinity of postconsumer-PET.** **a** The percentage crystallinity of the black tray. The melting onset is 252.9 °C. The melting peak temperature is 256.6 °C. The glass transition temperature is 62.3 °C. **b** The percentage crystallinity of the white tray. The melting onset is 242.0 °C. The melting peak temperature is 257.9 °C. The glass transition temperature is 66.2 °C. **c** The percentage crystallinity of amorphous PET. The melting onset is 231.9 °C. The melting peak temperature is 237.2 °C. The glass transition temperature is 70.5 °C.

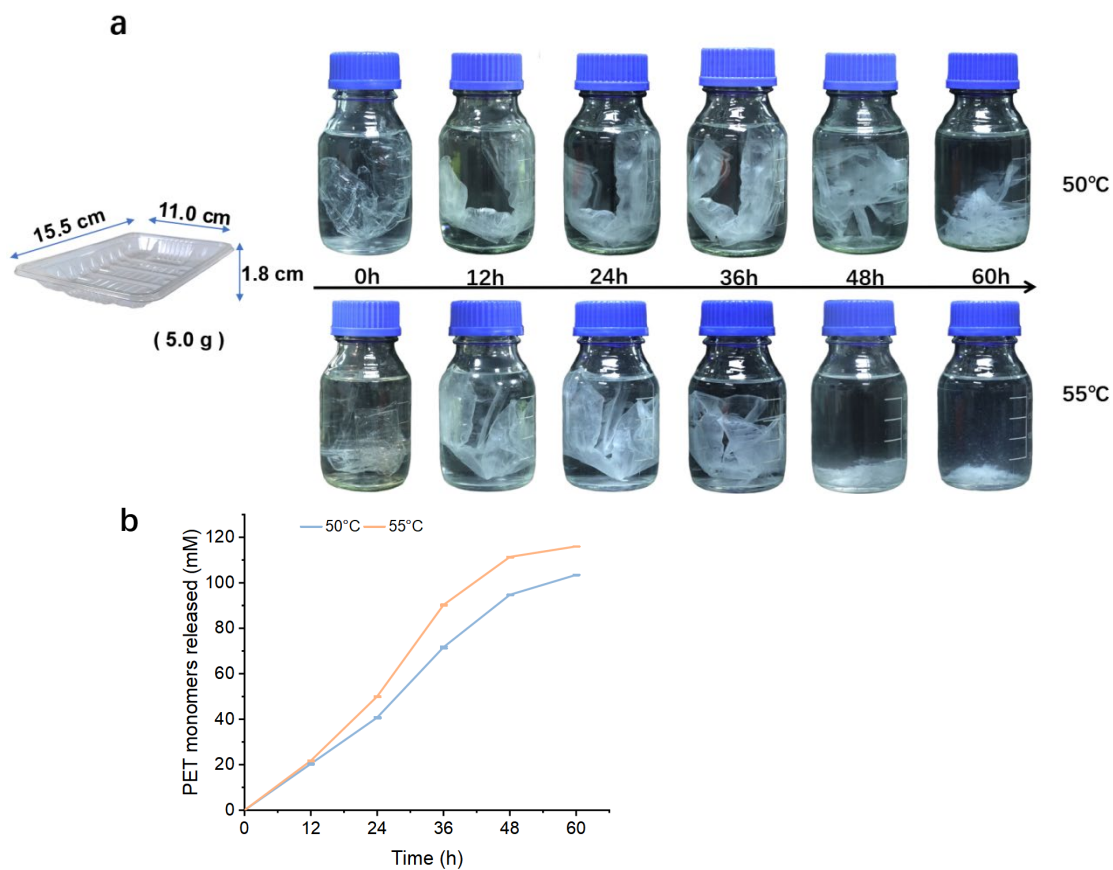

**Supplementary Fig.15: Depolymerization of the raw, untreated postconsumer-PET with partial-deglyco FAST-PETase-*Pp*.** **a** Degradation of untreated PET trays with partial-deglyco FAST-PETase-*Pp* at 50 °C and 55 °C, respectively. **b** Time course of PET monomers released from the flakes during the digestion. Data are presented as mean  $\pm$  SD.

**a**

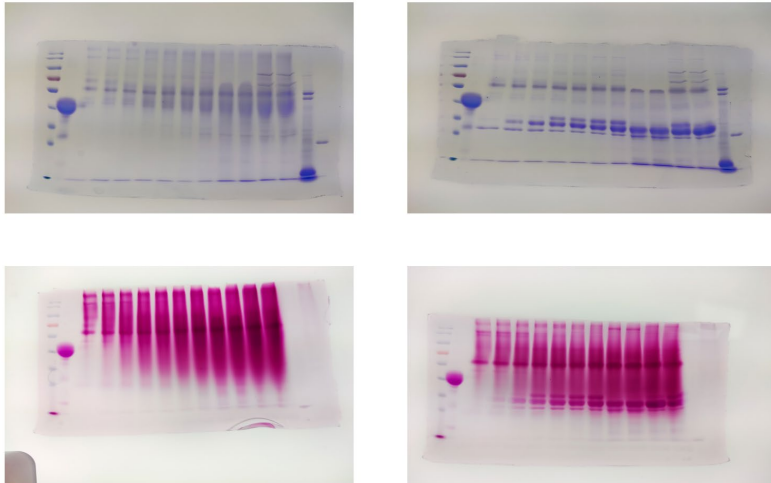

**b**

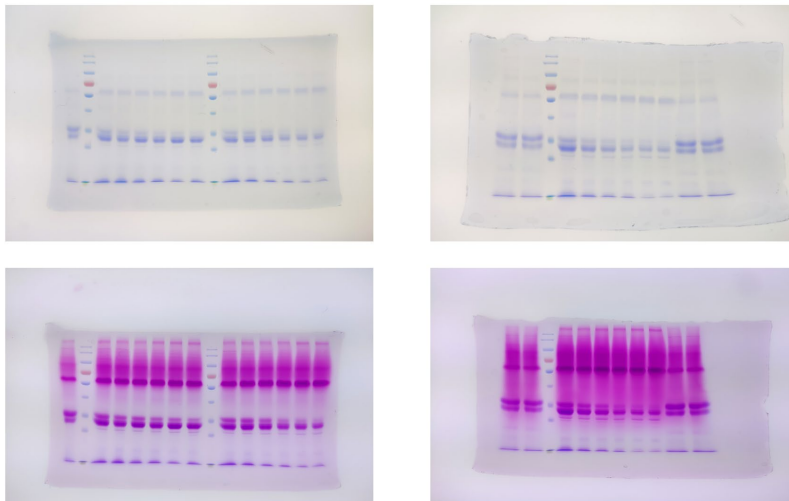

**c**

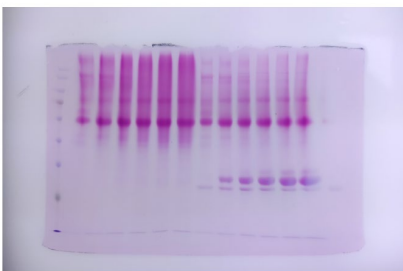

**Supplementary Fig.16: Uncropped and unedited SDS-PAGE gels. a** The uncropped SDS-PAGE gel of Fig.2. **b** The uncropped SDS-PAGE gel of Fig.4. **c** The uncropped SDS-PAGE gel of Fig.5.
